# Supplementary material for: Energy-Saving One-Step Pre-Treatment Using an Activated Sodium Percarbonate System and Its Bleaching Mechanism for Cotton Fabric
Source: MDPI journal article supplement (doi:10.3390/ma15175849), 2022-08-25
Supplement: s1 [file s1]

## Supplementary Material for

# Energy-Saving One-Step Pre-Treatment Using an Activated Sodium Percarbonate System and Its Bleaching Mechanism for Cotton Fabric

Qing Li <sup>1,2,3,†</sup>, Run Lu <sup>1,†</sup>, Yan Liang <sup>1</sup>, Kang Gao <sup>1</sup> and Huiyu Jiang <sup>1,4,\*</sup>

<sup>1</sup> Hubei Key Laboratory of Biomass Fibers and Eco-Dyeing & Finishing, College of Chemistry and Chemical Engineering, Wuhan Textile University, Wuhan 430200, China

<sup>2</sup> Jiangsu Engineering Research Center of Textile Dyeing and Printing for Energy Conservation, Discharge Reduction and Cleaner Production, Soochow University, Suzhou 215123, China

<sup>3</sup> Key Laboratory of Clean Dyeing and Finishing Technology of Zhejiang Province, Shaoxing University, Shaoxing 312000, China

<sup>4</sup> National Innovation Center of Advanced Dyeing and Finishing Technology, Tai'an 271000, China

\* Correspondence: dongminjiang@163.com

† These authors contributed equally to this work.

## Contents of Supporting Information

*4 figures in 5pages*

Section Page

|           |       |
|-----------|-------|
| Figure S1 | S2    |
| Figure S2 | S2-S3 |
| Figure S3 | S3-S4 |
| Figure S4 | S5    |

## Figures

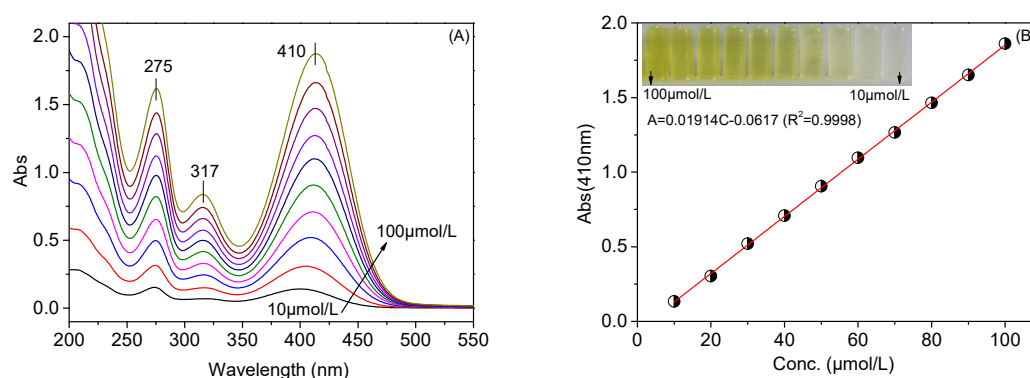

**Figure S1** UV-Vis absorption spectrum (A) and standard curve (B) of morin solution

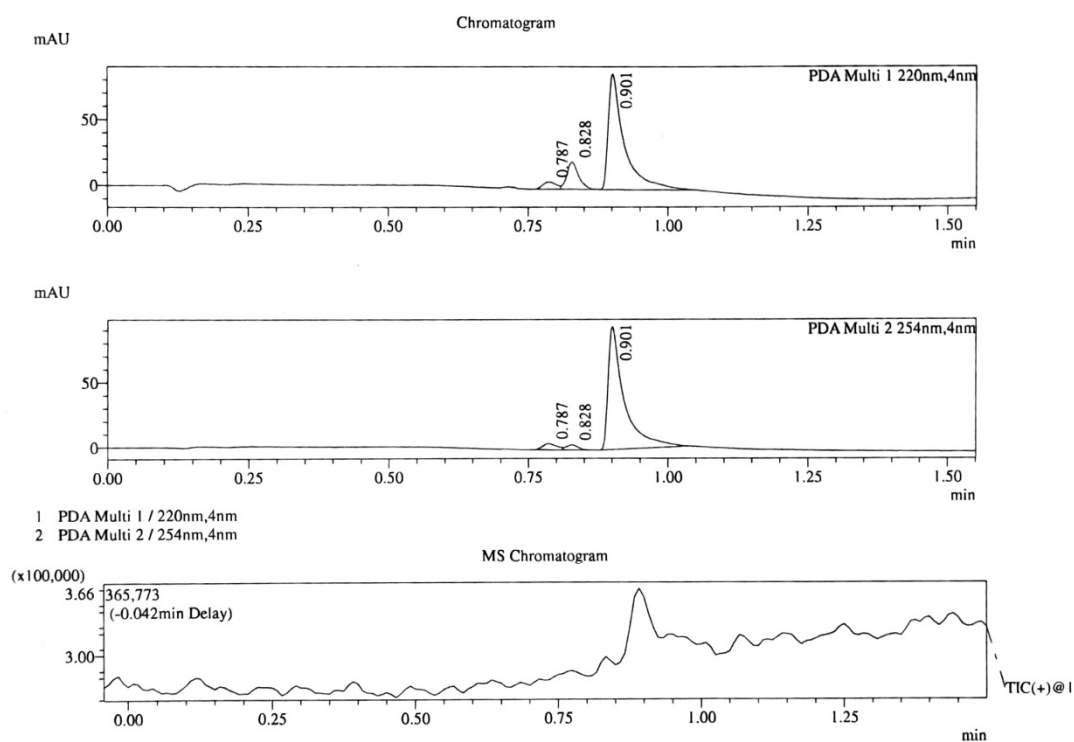

### Integration Result

| Peak Table    |           |        |         |           |        |        |
|---------------|-----------|--------|---------|-----------|--------|--------|
| PDA Ch1 220nm |           |        |         |           |        |        |
| Peak#         | Ret. Time | Height | Height% | USP Width | Area   | Area%  |
| 1             | 0.787     | 5770   | 5.044   | 0.052     | 9765   | 4.530  |
| 2             | 0.828     | 20791  | 18.177  | 0.039     | 30067  | 13.946 |
| 3             | 0.901     | 87816  | 76.778  | 0.043     | 175757 | 81.524 |

  

| Peak Table    |           |        |         |           |        |        |
|---------------|-----------|--------|---------|-----------|--------|--------|
| PDA Ch2 254nm |           |        |         |           |        |        |
| Peak#         | Ret. Time | Height | Height% | USP Width | Area   | Area%  |
| 1             | 0.787     | 4814   | 4.639   | 0.051     | 8387   | 4.082  |
| 2             | 0.828     | 3912   | 3.769   | 0.042     | 5464   | 2.659  |
| 3             | 0.901     | 95047  | 91.592  | 0.043     | 191602 | 93.258 |

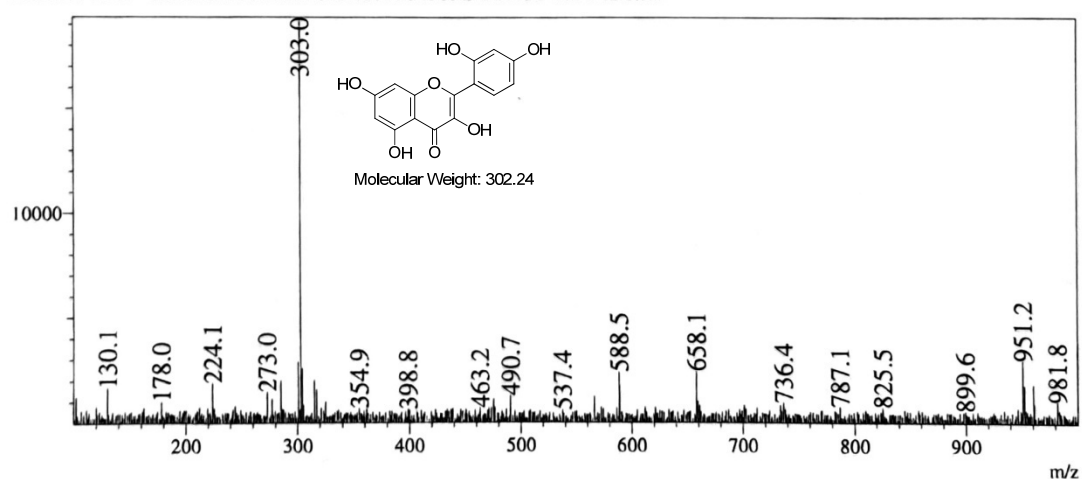

**Figure S2** LC-MS of Morin (ESI+)

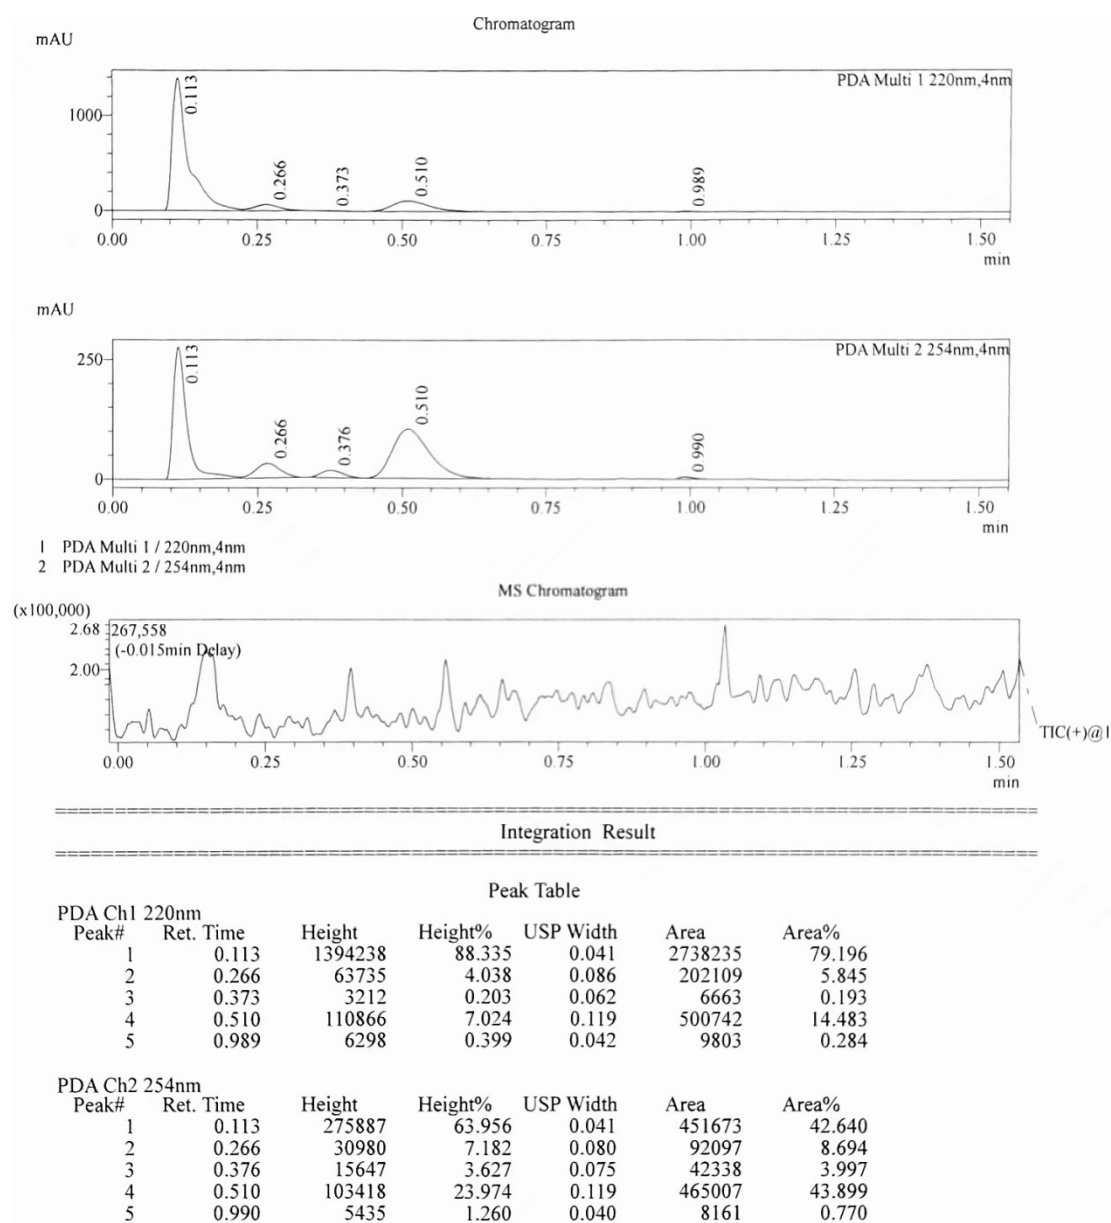

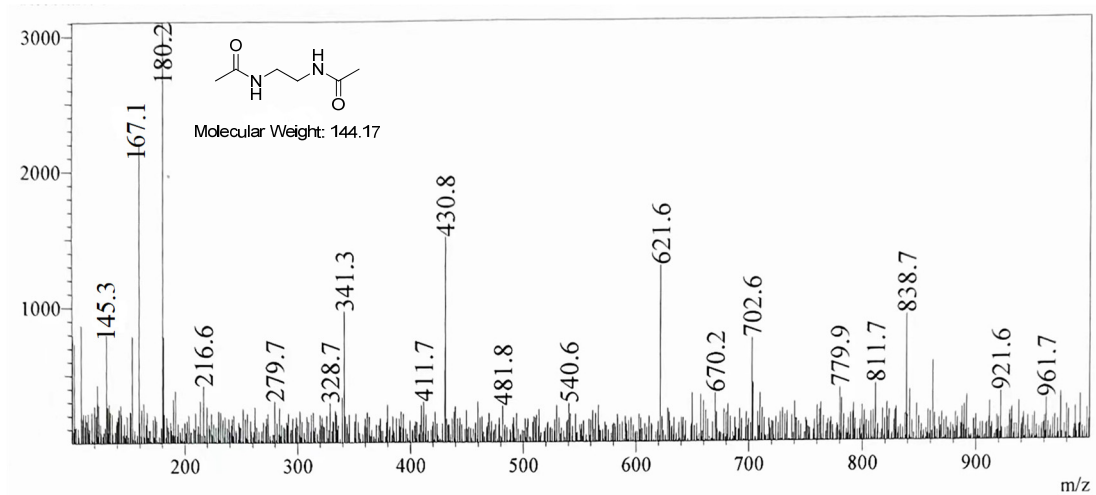

**Figure S3** LC-MS of reaction solution (ESI+)

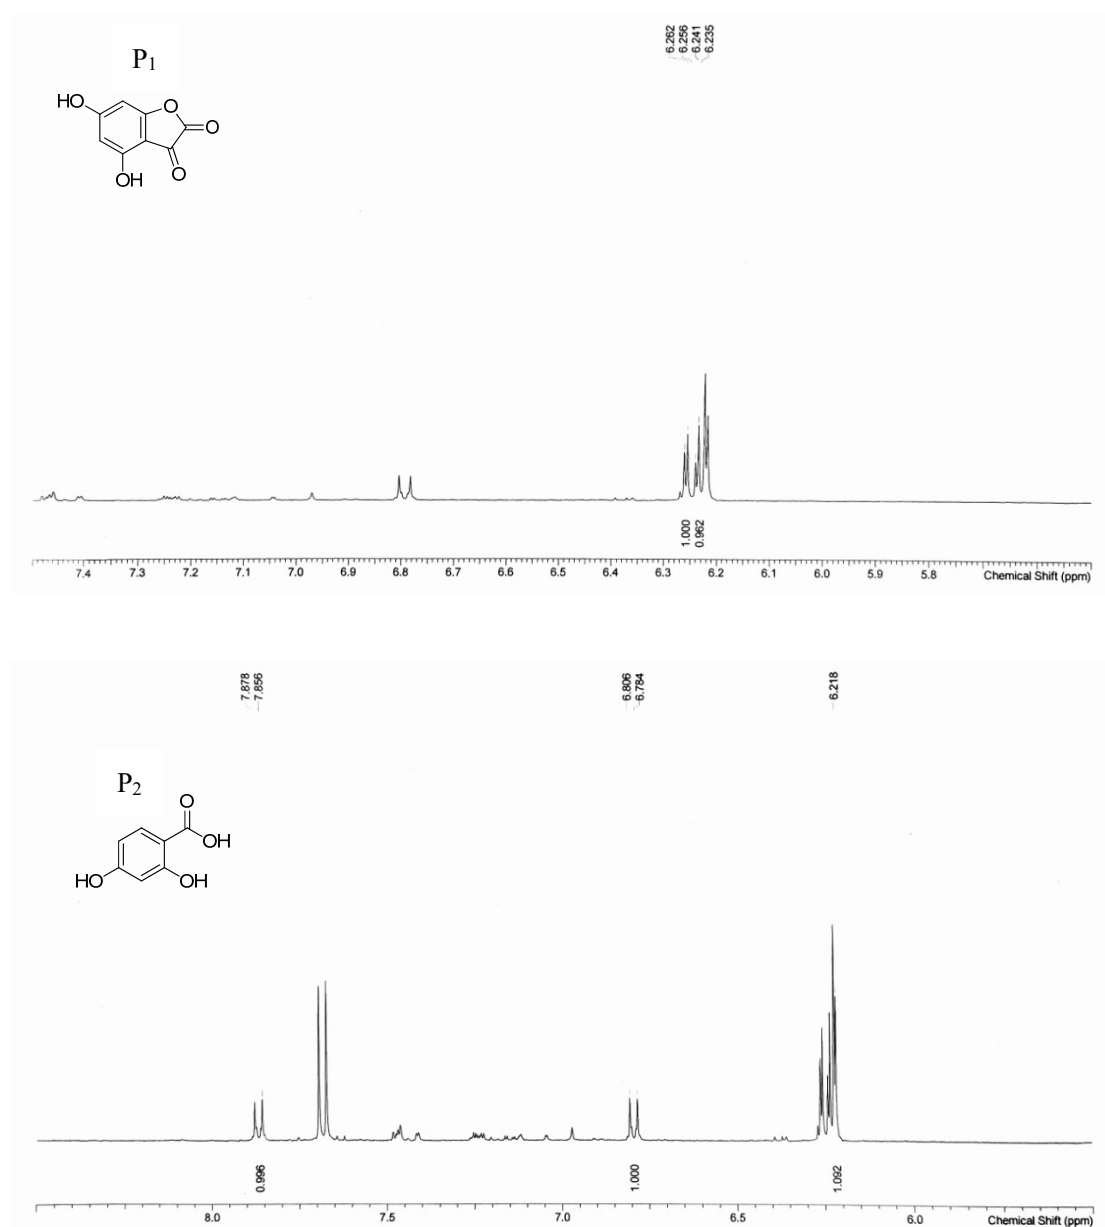

**Figure S4**<sup>1</sup>H-NMR of the degradation products of morin in SPC/TAED system
